# Supplementary material
Source: PubMed Central journal article supplement (PMC3430730)

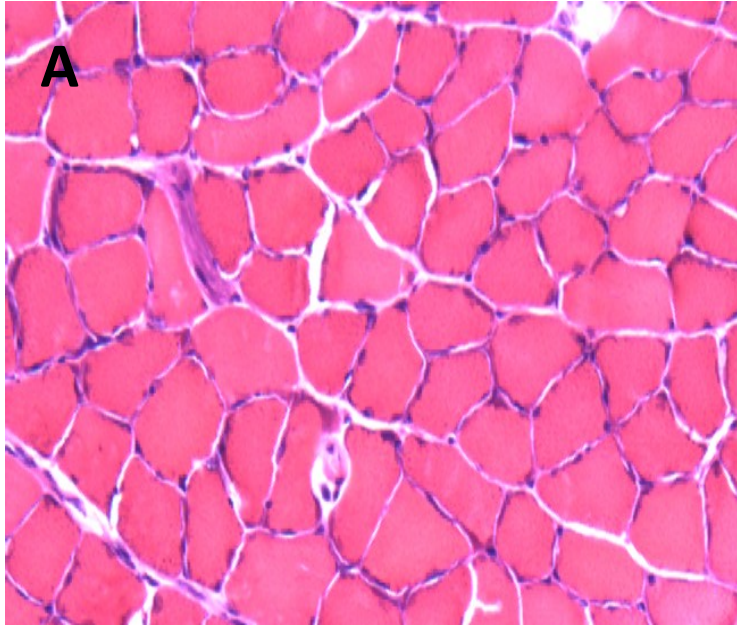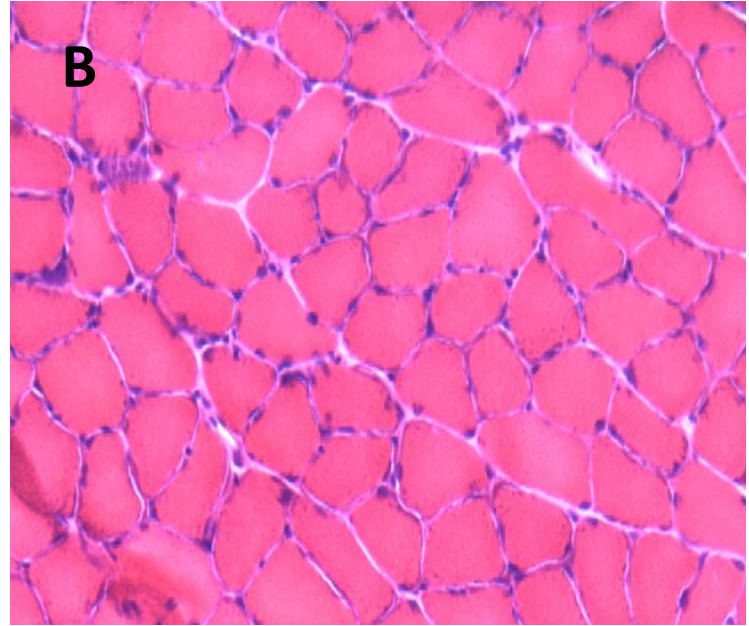

Supplement: NIHMS297033-supplement-01.pdf [file NIHMS297033-supplement-01.pdf]
